# Supplementary material for: Effects of Drought on Nutrient Uptake and the Levels of Nutrient-Uptake Proteins in Roots of Drought-Sensitive and -Tolerant Grasses
Source: PubMed Central journal article supplement (PMC6027393; doi:10.3390/plants7020028), 2018-03-30
Supplement: plants-07-00028-s001.pdf [file plants-07-00028-s001.pdf]

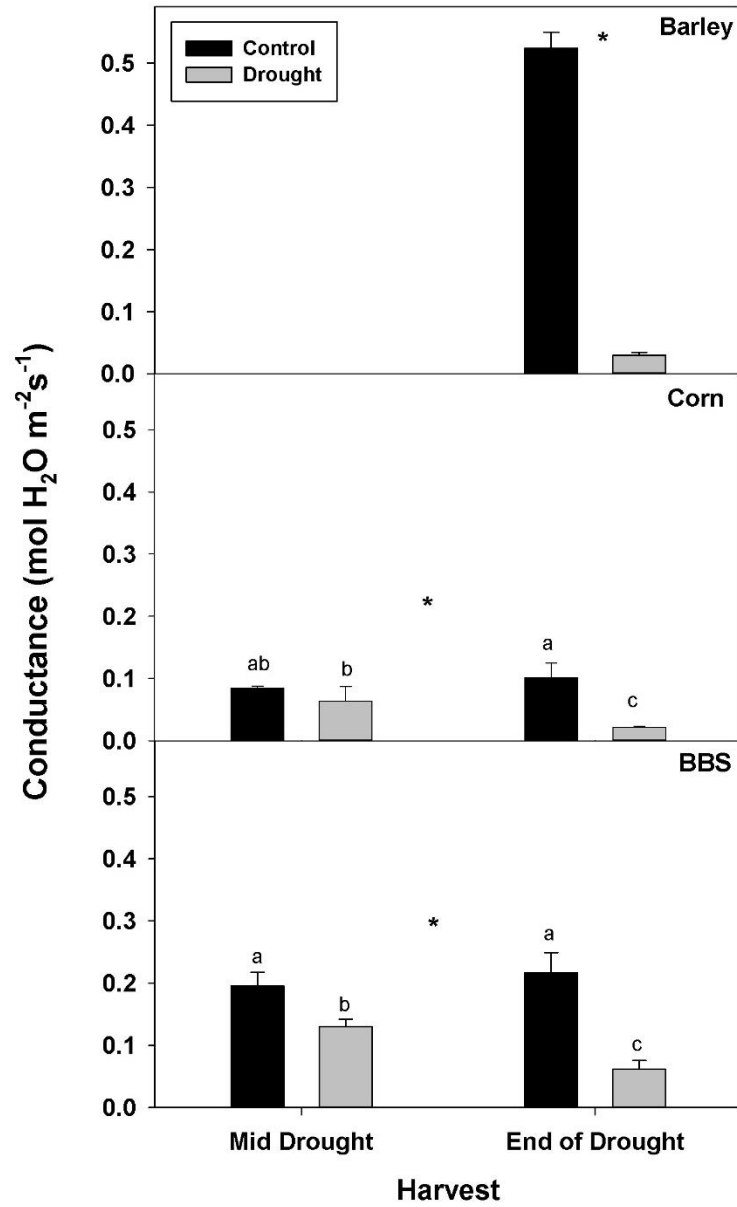

**Figure S1.** Effects of control vs. drought treatments on leaf stomatal conductance to water vapor ( $G_s$ ) in barley, corn, and big bluestem (BBS). Each bar represents mean + 1 SE (standard error). Within each panel, bars not sharing the same letters are significantly different. For each response variable, significant effects of drought (ANOVA), across both harvest in corn and big bluestem, are indicated with an asterisk (\*).

**Table S1.** Results (*p* values) from ANOVA statistical analyses for Barley.

| <b>Response Variable</b>    | <b>Drought Effect</b> |
|-----------------------------|-----------------------|
| Stomatal conductance        | 0.0001                |
| Shoot dry mass              | <0.0001               |
| Root dry mass               | 0.0164                |
| Total dry mass              | 0.0004                |
| Shoot:root mass             | 0.0002                |
| Root %N                     | 0.0003                |
| Shoot %N                    | 0.0002                |
| Total plant %N              | <0.0001               |
| Root % P                    | 0.0001                |
| Shoot % P                   | 0.0017                |
| Total plant %P              | 0.0005                |
| N uptake rate               | <0.0001               |
| P uptake rate               | 0.0375                |
| Total root protein          | 0.0001                |
| NRT1 per unit total protein | 0.0005                |
| NRT1 per g of dry root      | 0.7789                |
| AMT1 per unit total protein | 0.0944                |
| AMT1 per g of dry root      | 0.2217                |
| PHT1 per unit total protein | 0.0538                |
| PHT1 per g of dry root      | 0.0013                |
| PHT 1 Activity              | 0.0001                |

**Table S2.** Results (*p* values) from ANOVA statistical analyses for Corn.

| <b>Response Variable</b>    | <b>Harvest (H)<br/>Effect</b> | <b>Drought (D)<br/>Effect</b> | <b>H × D Effect</b> |
|-----------------------------|-------------------------------|-------------------------------|---------------------|
| Stomatal conductance        | 0.1983                        | <0.0001                       | 0.0049              |
| Shoot dry mass              | <0.0001                       | 0.2412                        | 0.0001              |
| Root dry mass               | <0.0001                       | 0.7564                        | 0.8696              |
| Total dry mass              | <0.0001                       | 0.4547                        | 0.0003              |
| Shoot:root mass             | 0.0001                        | 0.0806                        | <0.0001             |
| Root %N                     | 0.3394                        | 0.0483                        | 0.2084              |
| Shoot %N                    | 0.0941                        | 0.0009                        | 0.0003              |
| Total plant %N              | 0.6270                        | 0.0027                        | 0.0005              |
| Root %P                     | <0.0001                       | <0.0001                       | 0.0001              |
| Shoot %P                    | 0.0010                        | 0.0166                        | 0.2693              |
| Total plant %P              | 0.0148                        | 0.0010                        | 0.7350              |
| N uptake rate               | <0.0001                       | 0.0070                        | <0.0001             |
| P uptake rate               | 0.0262                        | 0.0066                        | 0.6972              |
| Total root protein          | 0.6256                        | 0.0384                        | 0.5413              |
| NRT1 per unit total protein | 0.1480                        | 0.0136                        | 0.4886              |
| NRT1 per g of dry root      | 0.6050                        | 0.4629                        | 0.5316              |
| AMT1 per unit total protein | 0.2314                        | <0.0001                       | 0.0041              |
| AMT1 per g of dry root      | 0.0036                        | 0.0027                        | 0.0114              |
| PHT1 per unit total protein | 0.0134                        | 0.0003                        | 0.0831              |
| PHT1 per g of dry root      | 0.0004                        | 0.0066                        | 0.0136              |
| PHT 1 Activity              | 0.0009                        | 0.3917                        | 0.4386              |

**Table S3.** Results (*p* values) from ANOVA statistical analyses for Big Bluestem.

| <b>Response Variable</b>    | <b>Harvest (H)<br/>Effect</b> | <b>Drought (D)<br/>Effect</b> | <b>H × D Effect</b> |
|-----------------------------|-------------------------------|-------------------------------|---------------------|
| Stomatal conductance        | 0.0153                        | <0.0001                       | 0.0001              |
| Shoot dry mass              | <0.0001                       | 0.0656                        | 0.0002              |
| Root dry mass               | 0.0160                        | 0.5275                        | 0.8050              |
| Total dry mass              | 0.0002                        | 0.2744                        | 0.0871              |
| Shoot:root mass             | 0.0309                        | 0.2334                        | 0.0196              |
| Root %N                     | 0.4172                        | 0.1488                        | 0.3299              |
| Shoot %N                    | 0.6691                        | 0.0098                        | 0.5953              |
| Total plant %N              | 0.6270                        | 0.0027                        | 0.0005              |
| Root % P                    | 0.9583                        | 0.0214                        | 0.4946              |
| Shoot % P                   | 0.4103                        | 0.1229                        | 0.3896              |
| Total plant %P              | 0.5910                        | 0.0330                        | 0.8095              |
| N uptake rate               | 0.6144                        | 0.0023                        | 0.2154              |
| P uptake rate               | <0.0001                       | 0.2556                        | 0.0079              |
| Total root protein          | 0.4554                        | 0.6535                        | 0.0457              |
| NRT1 per unit total protein | 0.5385                        | <0.0001                       | <0.0001             |
| NRT1 per g of dry root      | 0.0029                        | 0.0674                        | 0.0002              |
| AMT1 per unit total protein | 0.6239                        | 0.0004                        | 0.1297              |
| AMT1 per g of dry root      | 0.1011                        | 0.0032                        | 0.0038              |
| PHT1 per unit total protein | 0.0069                        | 0.4307                        | 0.8007              |
| PHT1 per g of dry root      | 0.0227                        | 0.2245                        | 0.1603              |
| PHT 1 Activity              | <0.0001                       | 0.0640                        | 0.4134              |
